# Supplementary material
Source: Research Square preprint supplement (doi:10.21203/rs.3.rs-9445490/v1)
Supplement: Supplementary file 1 [file 9f56c46af64936a25d04ed59.docx]

**Supplementary File: A**

**Table 1.** Indirect Effects via SGC on Task Performance

| **Indirect Paths** | **Indirect Effects (β)** | **t-values** | **p-values** | **95% CIs** | **Mediation Types** |
| --- | --- | --- | --- | --- | --- |
| LMX → SGC → TP | 0.124 | 4.89 | < 0.001 | [0.081-0.168] | Full |
| SL → SGC → TP | 0.105 | 4.42 | < 0.001 | [0.061-0.150] | Full |
| PL → SGC → TP | 0.109 | 4.55 | <0.001 | [0.065-0.155] | Partial |
| LCC → SGC → TP | 0.082 | 3.74 | <0.001 | [0.041-0.125] | Partial |

*Note*: LMX = Leader–Member Exchange, SL = Servant Leadership, PL = Participative Leadership, LCC = Leadership Communication Competence, SGC = Sense-Giving Communication, TP = Task Performance.

**Table 2.** Indirect Effects via SGC on Contextual Performance

| **Indirect Paths** | **Indirect Effects (β)** | **t-values** | **p-value** | **95% CIs** | **Mediation Types** |
| --- | --- | --- | --- | --- | --- |
| LMX → SGC → CP | 0.131 | 5.02 | < 0.001 | [0.088-0.176] | Full |
| SL → SGC → CP | 0.110 | 4.61 | < 0.001 | [0.067-0.154] | Full |
| PL → SGC → CP | 0.113 | 4.70 | < 0.001 | [0.070-0.158] | Partial |
| LCC → SGC → CP | 0.086 | 3.88 | < 0.001 | [0.045-0.129] | Partial |

*Note*: LMX = Leader–Member Exchange, SL = Servant Leadership, PL = Participative Leadership, LCC = Leadership Communication Competence, SGC = Sense-Giving Communication, CP= Contextual Performance.

**Table 3.** Indirect Effects via SGC on Counterproductive Behavior

| **Indirect Paths** | **Indirect Effect (β)** | **t-value** | **p-value** | **95% CI** | **Mediation Type** |
| --- | --- | --- | --- | --- | --- |
| LMX → SGC → CWB | -0.096 | 4.11 | < 0.001 | [-0.141 -0.053] | Full |
| SL → SGC → CWB | -0.082 | 3.79 | <0.001 | [-0.126-0.040] | Full |
| PL → SGC → CWB | -0.085 | 3.92 | < 0.001 | [-0.129-0.043] | Partial |
| LCC → SGC → CWB | -0.068 | 3.41 | < 0.001 | [-0.110-0.028] | Partial |

*Note*: LMX = Leader–Member Exchange, SL = Servant Leadership, PL = Participative Leadership, LCC = Leadership Communication Competence, SGC = Sense-Giving Communication, CWB= Counterproductive Behavior.
