# Supplementary material
Source: Research Square preprint supplement (doi:10.21203/rs.3.rs-9445490/v1)
Supplement: Supplementary file 2 [file affa5ae3ad0a18e17e69ac57.docx]

**Supplementary File-B**

Table 1 presents the results of additional interaction-term analyses conducted as a robustness check for the moderating role of enterprise size. The findings indicate that all interaction effects between enterprise size and the predictor variables are statistically significant.

**Table 1.** Interaction Effects for Moderation (Robustness Check)

| **Interaction Path** | **p-value** | **Interpretation** |
| --- | --- | --- |
| LMX × Size → SGC | 0.041 | Significant |
| SL × Size → SGC | 0.048 | Significant |
| PL × Size → SGC | 0.007 | Significant |
| LCC × Size → SGC | 0.016 | Significant |
| SGC × Size → JP | 0.029 | Significant |

**Note:** Interaction terms estimated using regression-based moderation analysis. LMX = Leader–Member Exchange, SL = Servant Leadership, PL = Participative Leadership, LCC = Leadership Communication Competence, SGC = Sense-Giving Communication, JP = Job Performance.

Table 2 presents the results of Measurement Invariance of Composite Models**.**

**Table 2.** Results of Measurement Invariance of Composite Models

| **Construct** | **Configural Invariance** | **Compositional Invariance (c)** | **Mean Equality (p-value)** | **Variance Equality (p-value)** | **Level of Invariance** |
| --- | --- | --- | --- | --- | --- |
| LMX | Yes | 0.987 (p = 0.412) | 0.183 | 0.276 | Full Invariance |
| SL | Yes | 0.981 (p = 0.365) | 0.224 | 0.301 | Full Invariance |
| PL | Yes | 0.985 (p = 0.397) | 0.198 | 0.288 | Full Invariance |
| LCC | Yes | 0.978 (p = 0.342) | 0.167 | 0.254 | Full Invariance |
| SGC | Yes | 0.991 (p = 0.458) | 0.205 | 0.317 | Full Invariance |
| JP | Yes | 0.989 (p = 0.439) | 0.191 | 0.299 | Full Invariance |

**Note**: Abbreviations are consistent with Table 1.
